# Supplementary material for: Tunability of monodispersed intermetallic AuCu nanoparticles through understanding of reaction pathways
Source: Royal Society of Chemistry journal article supplement (doi:10.1039/c4ra12059k), 2014-12-09
Supplement: c4ra12059k1.pdf [file c4ra12059k1.pdf]

Supporting Information for

**Tunability of Monodispersed Intermetallic AuCu Nanoparticles through Understanding of  
Reaction Pathways**

S. K. Sinha<sup>a</sup>, C. Srivastava<sup>a</sup>, S. Sampath<sup>b</sup> and K. Chattopadhyay<sup>a</sup> \*

<sup>a</sup>Department of Materials Engineering, Indian Institute of Science, Bangalore-560 012, India,

<sup>b</sup>Department of Inorganic and Physical Chemistry, Indian Institute of Science, Bangalore-560 012, India

\*Corresponding author. E-mail: [kamanio@materials.iisc.ernet.in](mailto:kamanio@materials.iisc.ernet.in)

**Table S1.** This table lists the surfactant-to-metal precursor ratio, oleylamine and oleic acid concentrations.

| Dispersions | Surfactants-to-Metal<br>Precursor Ratio | Oleylamine<br>(mL) | Oleic acid<br>(mL) | HAuCl <sub>4</sub><br>(mmol) | Cu(acac) <sub>2</sub><br>(mmol) |
|-------------|-----------------------------------------|--------------------|--------------------|------------------------------|---------------------------------|
| 1           | 1:1                                     | 0.12               | 0.1                | 0.18                         | 0.20                            |
| 2           | 10:1                                    | 1.2                | 1.0                | 0.18                         | 0.20                            |
| 3           | 20:1                                    | 2.4                | 2.0                | 0.18                         | 0.20                            |
| 4           | 40:1                                    | 4.8                | 4.0                | 0.18                         | 0.20                            |
| 5           | 80:1                                    | 8.5                | 8.0                | 0.18                         | 0.20                            |

**Table S2.A** table listing the amount of oleylamine-to-oleic acid ratio and extracted specimen temperature for the dispersion 6, 7, and 8.

| Dispersions | Molar ratio<br>(Oleylamine/Oleic acid) | Oleylamine<br>(mL) | Oleic Acid<br>(mL) | H <sub>2</sub> AuCl <sub>4</sub><br>(mmol) | Cu(acac) <sub>2</sub><br>(mmol) |
|-------------|----------------------------------------|--------------------|--------------------|--------------------------------------------|---------------------------------|
| 6           | 0.3                                    | 2.5                | 6.5                | 0.18                                       | 0.20                            |
| 7           | 1.0                                    | 4.8                | 4.0                | 0.18                                       | 0.20                            |
| 8           | 3.0                                    | 6.8                | 2.0                | 0.18                                       | 0.20                            |

**Table S3.** This table lists the ingredients for step I and step II to synthesized different sizes of Au–Cu nanoparticles.

|       | Step I                                  |         |          |        |                     | Step II                      |         |          |         |          | Size of Au–CuNPs (nm) |
|-------|-----------------------------------------|---------|----------|--------|---------------------|------------------------------|---------|----------|---------|----------|-----------------------|
|       | H <sub>2</sub> AuCl <sub>4</sub> (mmol) | HDD (g) | OAm (mL) | T (°C) | Size of Au–NPs (nm) | Cu(acac) <sub>2</sub> (mmol) | HDD (g) | OAm (mL) | OA (mL) | DPE (mL) |                       |
| Set 1 | 0.13                                    | 1.0     | 10       | 120    | 4.3±0.8             | 0.02                         | 0.11    | 2.0      | 2.0     | 10       | 5.2±0.9               |
| Set 2 | 0.09                                    | 0.20    | 10       | 120    | 5.8±0.9             | 0.01                         | 0.05    | 2.0      | 2.0     | 10       | 7.0±1.0               |
| Set 3 | 0.09                                    | 0.20    | 10       | 180    | 8.9±1.5             | 0.06                         | 0.2     | 4.0      | 4.0     | 10       | 9.5±1.7               |
